# Supplementary material for: No effect of vitamin D supplementation on metabolic parameters but on lipids in patients with type 2 diabetes and chronic kidney disease
Source: Atypon-hosted journal article supplement (doi:10.1024/0300-9831/a000642), 2020-03-09
Supplement: 0300-9831_a000642_esm1.pdf [file 0300-9831_a000642_esm1.pdf]

**SUPPLEMENTAL TABLE E1.** Comparison of mean differences between three groups according to eGFR

| <b>eGFR <math>\geq</math> 60mL/min/1.73m<sup>2</sup></b> | Placebo           | Oral 1,000 IU daily | 200,000 IU injection | p-value*   |
|----------------------------------------------------------|-------------------|---------------------|----------------------|------------|
|                                                          | (group A, n = 17) | (group B, n = 14)   | (group C, n = 13)    |            |
| baPWV (cm/sec)                                           | -41.6 $\pm$ 36.9  | 21.8 $\pm$ 37.2     | 12.7 $\pm$ 52.5      | 0.482      |
| ABI                                                      | 0.03 $\pm$ 0.020  | 0.02 $\pm$ 0.02     | -0.01 $\pm$ 0.03     | 0.470      |
| FGF-23 (pg/mL)                                           | 0.85 $\pm$ 1.55   | 1.25 $\pm$ 1.48     | 0.40 $\pm$ 2.38      | 0.948      |
| Sclerostin (pg/mL)                                       | 27.7 $\pm$ 21.1   | -1.7 $\pm$ 21.2     | 25.6 $\pm$ 31.3      | 0.599      |
| 25(OH)D (ng/mL)                                          | -3.2 $\pm$ 1.3    | 9.1 $\pm$ 1.2       | 11.8 $\pm$ 1.9       | < 0.001**  |
| Adequacy of 25(OH)D (%)                                  | 0                 | 2 (14)              | 3 (23)               | 0.130      |
| Parathyroid hormone (pg/mL)                              | -2.4 $\pm$ 2.3    | -7.1 $\pm$ 2.2      | -2.5 $\pm$ 3.4       | 0.286      |
| Hemoglobin A1c (%)                                       | -0.05 $\pm$ 0.15  | 0.09 $\pm$ 0.15     | 0.19 $\pm$ 0.22      | 0.656      |
| Total-cholesterol (mg/dL)                                | -2.2 $\pm$ 11.4   | -5.7 $\pm$ 10.3     | 3.6 $\pm$ 14.9       | 0.877      |
| Triglyceride (mg/dL)                                     | 55.0 $\pm$ 32.0   | 16.2 $\pm$ 30.3     | -66.3 $\pm$ 48.8     | 0.145      |
| HDL-cholesterol (mg/dL)                                  | -1.3 $\pm$ 1.6    | -1.3 $\pm$ 1.5      | 3.3 $\pm$ 2.4        | 0.241      |
| LDL-cholesterol (mg/dL)                                  | -2.2 $\pm$ 4.8    | 10.2 $\pm$ 4.4      | 5.5 $\pm$ 7.1        | 0.206      |
| eGFR (mL/min/1.73m <sup>2</sup> )                        | -2.78 $\pm$ 1.85  | -0.94 $\pm$ 1.80    | 1.12 $\pm$ 2.73      | 0.516      |
| Calcium (mg/dL)                                          | -0.03 $\pm$ 0.10  | 0.03 $\pm$ 0.09     | -0.09 $\pm$ 0.13     | 0.712      |
| <b>eGFR &lt; 60 mL/min/1.73m<sup>2</sup></b>             | Placebo           | Oral 1,000 IU daily | 200,000 IU injection | p-value*   |
|                                                          | (group A, n = 16) | (group B, n = 20)   | (group C, n = 12)    |            |
| baPWV (cm/sec)                                           | 58.9 $\pm$ 79.0   | 57.7 $\pm$ 82.8     | 19.1 $\pm$ 148.1     | 0.973      |
| ABI                                                      | 0 $\pm$ 0.03      | 0.02 $\pm$ 0.03     | -0.01 $\pm$ 0.06     | 0.830      |
| FGF-23 (pg/mL)                                           | -1.04 $\pm$ 1.41  | 0.28 $\pm$ 1.43     | 5.26 $\pm$ 2.66      | 0.143      |
| Sclerostin (pg/mL)                                       | -2.3 $\pm$ 14.0   | 2.6 $\pm$ 14.0      | -2.1 $\pm$ 26.3      | 0.969      |
| 25(OH)D (ng/mL)                                          | -0.5 $\pm$ 2.3    | 11.8 $\pm$ 2.3      | 18.4 $\pm$ 3.6       | < 0.001*** |
| Adequacy of 25(OH)D (%)                                  | 1 (6)             | 5 (25)              | 7 (58)               | 0.028      |
| Parathyroid hormone (pg/mL)                              | -14.6 $\pm$ 3.1   | -8.6 $\pm$ 3.1      | -22.7 $\pm$ 5.5      | 0.129      |

|                                   |             |              |              |           |
|-----------------------------------|-------------|--------------|--------------|-----------|
| Hemoglobin A1c (%)                | 0.28 ± 0.16 | 0.23 ± 0.16  | 0.50 ± 0.25  | 0.716     |
| Total-cholesterol (mg/dL)         | 2.1 ± 7.5   | 0.1 ± 8.1    | -3.2 ± 11.9  | 0.934     |
| Triglyceride (mg/dL)              | 28.3 ± 14.1 | 43.3 ± 15.0  | -57.9 ± 26.3 | 0.019**** |
| HDL-cholesterol (mg/dL)           | -2.3 ± 3.0  | -1.9 ± 3.1   | 9.0 ± 5.4    | 0.229     |
| LDL-cholesterol (mg/dL)           | -3.6 ± 5.9  | 0.6 ± 6.1    | -0.4 ± 10.6  | 0.879     |
| eGFR (mL/min/1.73m <sup>2</sup> ) | 2.66 ± 3.75 | -0.81 ± 3.75 | 11.39 ± 6.04 | 0.301     |
| Calcium (mg/dL)                   | 0.06 ± 0.10 | 0.05 ± 0.10  | 0.35 ± 0.16  | 0.316     |

Data are presented as estimated mean ± standard error (SE); \*p value was calculated by ANCOVA with adjustment for age, sex, smoking status, duration of diabetes, history of cardiovascular disease, body mass index and baseline values; \*\*p value of overall mean differences between three groups: p < 0.001 between group A and B, p < 0.001 between group A and C, p = 0.135 between group B and C; \*\*\*p value of overall mean differences between three groups: p < 0.001 between group A and B, p < 0.001 between group A and C, p = 0.061 between group B and C; \*\*\*\*p value of overall mean differences between three groups: p = 0.4717 between group A and B, p = 0.011 between group A and C, p = 0.006 between group B and C; PWV, pulse wave velocity; ABI, ankle brachial index; FGF-23, fibroblast growth factor-23; HDL, high density lipoprotein; LDL, low density lipoprotein; eGFR, estimated glomerular filtration rate

<https://doi.org/10.1024/0300-9831/a000642>
